# Supplementary material for: Facial Skin Microbiome Composition and Functional Shift with Aging
Source: MDPI journal article supplement (doi:10.3390/microorganisms12051021), 2024-05-18

**Figure S1.** Krona plots highlighting the old and young skin samples bacterial composition. Proteobacteria composition in old cohort (a) and young cohort (b).

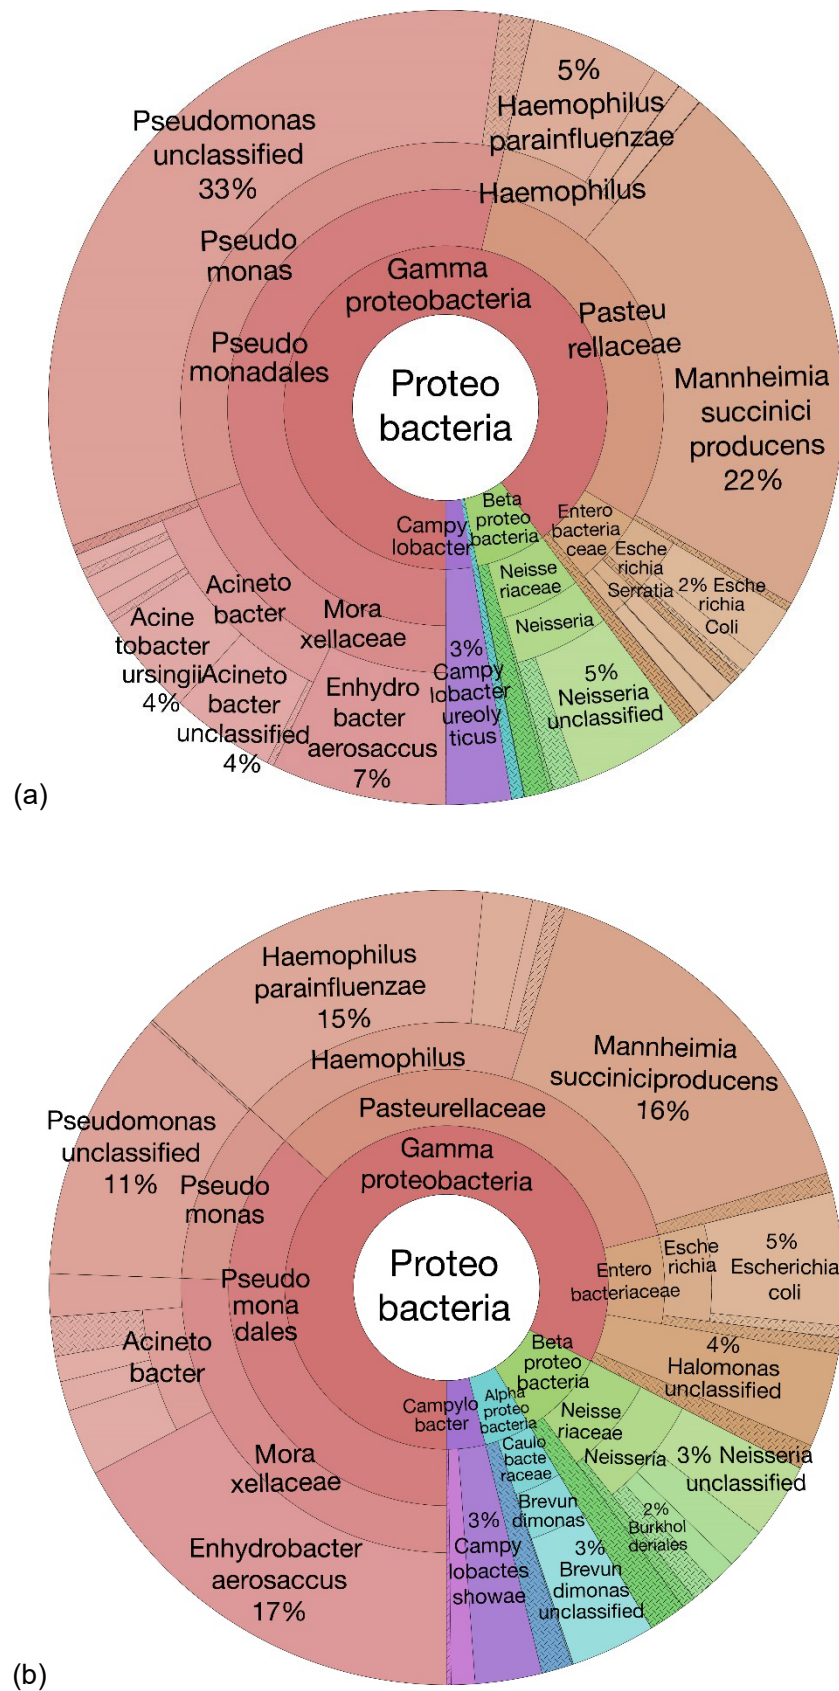

Supplement: s1 [file s1]
